# Supplementary material for: Towards better targeting: lessons from a posthoneymoon measles outbreak in Madagascar, 2018–2019
Source: PubMed Central journal article supplement — BMJ Glob Health. 2020 Oct 20;5(10):e003153. doi: 10.1136/bmjgh-2020-003153 (PMC7577030; doi:10.1136/bmjgh-2020-003153), 2020-10-20
Supplement: bmjgh-2020-003153supp002.pdf [file bmjgh-2020-003153supp002.pdf]

## FINTINA

Taona maromaro tao aorian'ny naha-ambany ny tahan'ny kitrotro teto Madagasikara dia niverina indray izany valan'aretina izany tamin'ny volana septambra 2018 ary nanomboka teo amin'ireo faritra afovoany teo Madagasikara.

Niparitaka ary nahakasika ireo faritra 22 manerana ny nosy ny valan'aretina kitrotro. Olona mihoatra ny 100 000 no voan'ny kitrotro tamin'izany ary olona teo ho eo amin'ny 1 000 teo no matiny.

Ny hatanjak'ilay valan'aretina kitrotro, ny taonan'ireo olona narary, ny fivoaran'ny tahan'ny valan'aretina ary ny fomba nanaovana vaksiny teto Madagasikara dia mifanandrify amin'ilay posakevitra epidemiolojika iray atao hoe: "post-honeymoon outbreak". Ny "post-honeymoon outbreak" dia valan'aretina niseho tao aorian'ny taona maromaro izay nahitana fahombiazana (sarintsarimpahombiazana) teo amin'ny ady amin'ny kitrotro.

Fanamby iray lehibe sy maika apetraka eto ny hamaritana ireo tranga na fambara ahafahana maminany io fotoana "post-honeymoon" io izay mahakasika ny valan'aretina kitrotro sy ireo aretina hafa azo sorohina amin'ny fanaovana vaksiny. Izany dia ahafahana mandray lesona avy amin'ity valan'aretina kitrotro nitranga ity mba ho fanatsarana ny fiomanana amin'ny fisorohana ny mety hisian'ny valan'aretina amin'ny ho avy sy ho fanatsarana ny paikady aroso.

Ny zava-nisy teto Madagasikara dia mampiseho fa zava-dehibe tokony hilofosana ny fananana antontan'isa mari-pototra sy mifanaraka ara-potoana tsara amin'ny zava-misy (manomboka amin'ny fanaraha-maso tsy tapaka ireo tranga ka hatramin'ny fanatanterahana ny vaksiny sy ny fitiliana ny singa ao anaty rà ahafahana manamarina fa mandaitra ilay vaksiny) mandritry ny dingana sy ny ezaka rehetra atao amin'ny ady amin'ny kitrotro mba ahafahana manao vaksiny ara-potoana ireo olona tokony hisitraka izany. Izany rehetra izany dia ahafahana misoroka ny fisian'ny valan'aretina sy ireo voka-dratsiny amin'ny ho avy.
